# Supplementary material for: Purpureocillium lilacinum and Metarhizium marquandii as plant growth-promoting fungi
Source: PeerJ journal article supplement (doi:10.7717/peerj.9005), 2020-05-27
Supplement: SupplementalTable_S1.docx [file SupplementalTable_S1.docx]

| **Treatments**  **(strains)** | **Means of the variables - Maize** | | | | | | | | |
| --- | --- | --- | --- | --- | --- | --- | --- | --- | --- |
| **Plant heigh (cm)** | **Shoot dry mass (g)** | **Root dry mass (g)** | **Total dry mass (g)** | | **P soil**  **(mg/dm3)** | | --- | | **P shoot g/kg** | **P root g/kg** | **N shoot g/kg** | **N root g/kg** |
| **Control** | 61.33 bc | 3.50 ab | 3.83 a | 7.33 a | 18.75 b | 1.08 ab | 1.43 a | 15.90 a | 8.30 c |
| **LSM 14** | 58.10 cd | 3.32 abc | 3.46 ab | 6.77 ab | 21.75 b | 0.98 b | 1.23 a | 15.78 a | 9.33 bc |
| **LSM 24** | 61.13 bc | 3.61 ab | 3.09 abc | 6.69 ab | 31.25 a | 1.23 a | 1.18 a | 16.80 a | 11.45 a |
| **LSM 62** | 57.50 cd | 2.85 bc | 2.62 c | 5.47 bc | 18.00 b | 1.13 ab | 1.10 a | 18.10 a | 10.58 ab |
| **LSM 65** | 70.04 a | 4.04 a | 3.15 abc | 7.19 a | 19.75 b | 1.10 ab | 1.30 a | 17.50 a | 11.55 a |
| **LSM 68** | 53.17 de | 2.99 bc | 2.80 bc | 5.79 bc | 23.25 b | 0.98 b | 0.63 b | 18.30 a | 10.55 ab |
| **LSM 179** | 66.42 ab | 3.64 ab | 2.68 bc | 6.32 abc | 17.75 b | 1.08 ab | 0.55 b | 17.15 a | 10.98 ab |
| **LSM 183** | 47.98 e | 2.60 c | 2.46 c | 5.06 c | 22.75 b | 0.98 b | 0.48 b | 17.43 a | 10.38 ab |
| **F Test** | 12.82** | 3.81** | 3.32* | 3.92** | 2.81* | 3.54** | 7.26** | 0.74NS | 2.99* |
| **VC** | 6.6% | 14.7% | 16.9% | 13.1% | 24.3% | 8.8% | 28.2% | 12.5% | 12.2% |
