# Supplementary material for: Purpureocillium lilacinum and Metarhizium marquandii as plant growth-promoting fungi
Source: PeerJ journal article supplement (doi:10.7717/peerj.9005), 2020-05-27
Supplement: SupplementalTable_S2.docx [file SupplementalTable_S2.docx]

| **Treatments**  **(strains)** | **Means of the variables - Bean** | | | | | | | | |
| --- | --- | --- | --- | --- | --- | --- | --- | --- | --- |
| **Plant heigh (cm)** | **Shoot dry mass (g)** | **Root dry mass (g)** | **Total dry mass (g)** | | **P soil**  **(mg/dm3)** | | --- | | **P shoot g/kg** | **P root g/kg** | **N shoot g/kg** | **N root g/kg** |
| **Control** | 26.80 a | 3.61 ab | 1.15 a | 4.76 ab | 21.75 a | 0.53 b | 1.28 a | 24.45 ab | 16.68 a |
| **LSM 14** | 21.79 abc | 2.91 b | 1.34 a | 4.25 ab | 11.50 b | 0.48 b | 1.58 a | 25.93 a | 17.60 a |
| **LSM 24** | 23.13 ab | 3.64 ab | 1.31 a | 4.95 ab | 16.25 ab | 0.53 b | 1.28 a | 20.05 bc | 17.03 a |
| **LSM 62** | 19.53 bc | 3.42 ab | 1.41 a | 4.83 ab | 11.75 b | 0.48 b | 1.15 a | 20.15 bc | 19.63 a |
| **LSM 65** | 22.83 ab | 2.93 b | 1.28 a | 4.20 ab | 11.75 b | 0.48 b | 1.45 a | 18.30 c | 18.38 a |
| **LSM 68** | 18.96 bc | 3.38 ab | 1.16 a | 4.54 ab | 12.50 b | 0.95 a | 1.38 a | 22.70 abc | 18.30 a |
| **LSM 179** | 16.17 c | 2.71 b | 1.21 a | 3.92 b | 11.00 b | 0.93 a | 1.33 a | 19.68 bc | 18.28 a |
| **LSM 183** | 23.96 ab | 3.97 a | 1.19 a | 5.16 a | 13.25 b | 1.03 a | 1.40 a | 18.55 c | 17.03 a |
| **F Test** | 3.35* | 2.13NS | 0.76NS | 1.54NS | 2.30NS | 26.23** | 0.76NS | 2.89* | 0.99NS |
| **VC** | 16.8% | 17.9% | 17.1% | 14.9% | 35.0% | 14.3% | 21.7% | 15.6% | 10.9% |
