# Supplementary material for: Purpureocillium lilacinum and Metarhizium marquandii as plant growth-promoting fungi
Source: PeerJ journal article supplement (doi:10.7717/peerj.9005), 2020-05-27
Supplement: SupplementalTable_S3.docx [file SupplementalTable_S3.docx]

| **Treatments**  **(strains)** | **Means of the variables - Soybean** | | | | | | | | | |
| --- | --- | --- | --- | --- | --- | --- | --- | --- | --- | --- |
| **Plant heigh (cm)** | **Shoot dry mass (g)** | **Root dry mass (g)** | **Total dry mass (g)** | **N soil (%)** | **P soil (g/dm3)** | **P shoot g/kg** | **P root g/kg** | **N shoot g/kg** | **N root g/kg** |
| **Controle** | 22.21 bc | 1.71 a | 0.96 b | 2.67 b | 0.048 b | 10.00 a | 0.95 a | 1.05 a | 29.10 a | 23.28 a |
| **LSM 14** | 21.92 bc | 1.68 a | 1.03 ab | 2.71 b | 0.050 b | 16.50 a | 0.98 a | 1.00 a | 32.75 a | 23.40 a |
| **LSM 24** | 23.54 ab | 1.99 a | 1.26 a | 3.25 a | 0.053 b | 10.50 a | 0.98 a | 1.15 a | 28.98 a | 22.88 a |
| **LSM 62** | 23.25 abc | 1.76 a | 1.08 ab | 2.84 ab | 0.060 b | 11.50 a | 0.98 a | 1.18 a | 30.10 a | 25.20 a |
| **LSM 65** | 23.67 ab | 1.72 a | 1.07 ab | 2.79 ab | 0.043 b | 13.00 a | 0.95 a | 1.05 a | 31.75 a | 24.50 a |
| **LSM 68** | 22.92 abc | 1.74 a | 1.15 ab | 2.89 ab | 0.003 c | 12.50 a | 0.90 a | 1.23 a | 32.08 a | 24.95 a |
| **LSM 179** | 25.08 a | 1.88 a | 1.18 ab | 3.06 ab | 0.100 a | 13.75 a | 0.85 a | 1.25 a | 31.53 a | 24.65 a |
| **LSM 183** | 20.79 c | 1.66 a | 1.15 ab | 2.81 ab | 0.075 ab | 13.75 a | 0.90 a | 1.28 a | 31.63 a | 24.30 a |
| **F Test** | 2.73* | 0.98NS | 1.50NS | 1.42NS | 6.43** | 0.32NS | 1.19NS | 1.45NS | 0.85NS | 0.66NS |
| **VC** | 6.8% | 12.6% | 14.0% | 11.2% | 40.9% | 58.4% | 9.1% | 14.9% | 9.9% | 8.7% |
